# Supplementary material for: Rapid and specific detection of cell-derived microvesicles using a magnetoresistive biochip
Source: Royal Society of Chemistry journal article supplement (doi:10.1039/c6an02651f), 2017-01-01
Supplement: c6an02651f1.pdf [file c6an02651f1.pdf]

Supplementary Figure 1

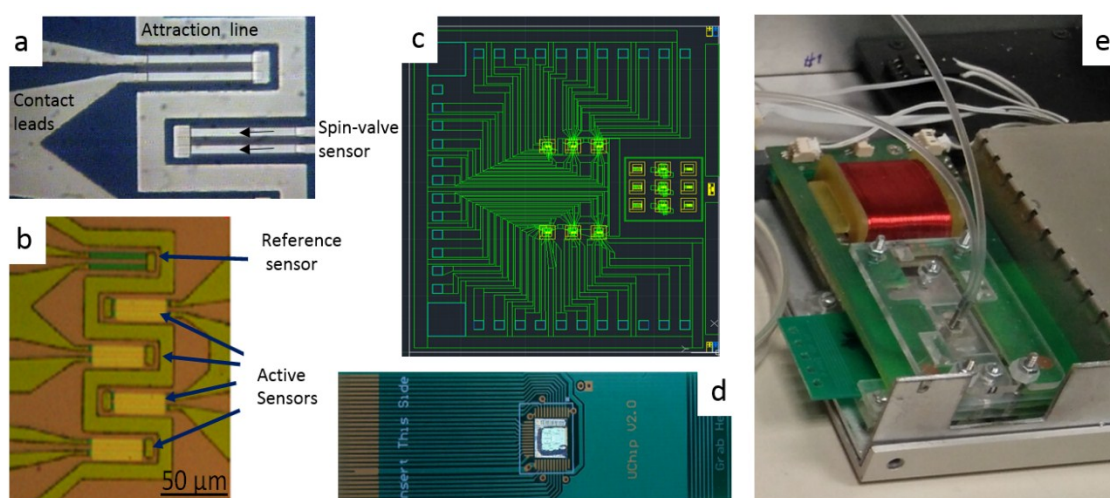

Supplementary Figure 1: Magneto-resistive biochip: a) magneto-resistive thin film sensors, with the surrounding current lines, b) four active sensors (with gold) plus a reference sensor (without gold), c) design of the entire chip, including test and six sensing regions each one including 4+1 sensors, d) chip mounted on a PCB card, protected with silicone and with the sensor area accessible to the top microfluidics module and e) integrated platform, with the PCB inserted and the microfluidics.
